# Supplementary material for: Enhancing Thermal Insulation of EPDM Ablators via Constructing Alternating Planar Architectures
Source: MDPI journal article supplement (doi:10.3390/polym14081570), 2022-04-12
Supplement: s1 [file s1]

## Supporting information

### Enhancing thermal insulation of EPDM ablators via constructing alternating planar architecture

Hongjian Qu, Kun Hui, Le Wang, Cheng Bian, Hongyan Li, Yiwen Guan, Tao Luan, Ning Yan

Xi'an Modern Chemistry Research Institute, Shaanxi, China

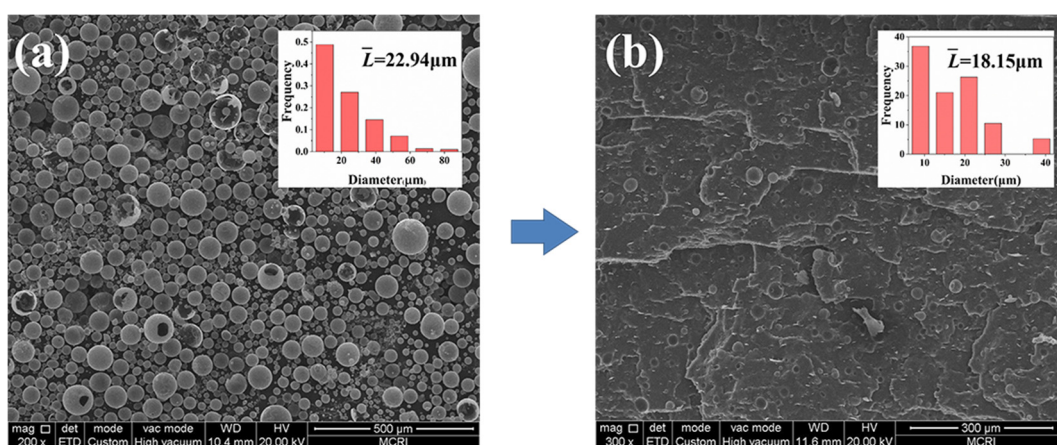

Figure S1. The SEM images of (a) microspheres, and (b) heat-insulated EPDM

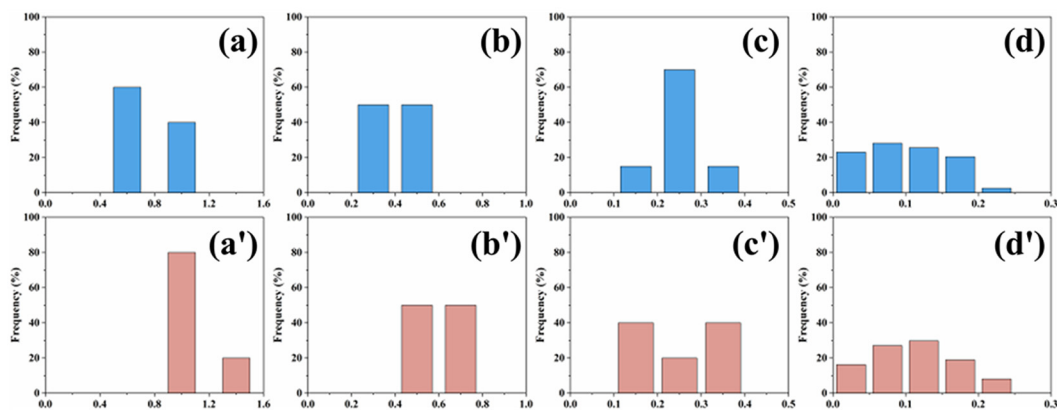

Figure S2. The thickness of the multilayer EPDM composites with different layers, (a, a') (AM/HM)<sub>10</sub>; (b, b') (AM/HM)<sub>20</sub>; (c, c') (AM/HM)<sub>40</sub>; (d, d') (AM/HM)<sub>80</sub>; the AM component represented by brown, and HM component represented by blue.

**Table S1.** Formulation of EPDM materials.

| Samples                      | AM  | HM  |
|------------------------------|-----|-----|
| EPDM                         | 100 | 100 |
| Liquid EPDM                  | 0   | 15  |
| Boron Phenolic               | 20  | 0   |
| DM                           | 1.5 | 1.5 |
| D                            | 1   | 1   |
| EZ                           | 1   | 1   |
| ZnO                          | 3   | 3   |
| SA                           | 1   | 1   |
| S                            | 1.5 | 1.5 |
| SiO <sub>2</sub>             | 20  | 20  |
| FL                           | 2.5 | 0   |
| CF                           | 2.5 | 0   |
| Borosilicate<br>microspheres | 0   | 10  |

**Table S2.** Data of TG/DTG of the EPDM composites.

| Samples               | Max decomposition temperature(°C) | Residual mass(%) |
|-----------------------|-----------------------------------|------------------|
| HM                    | 452.30                            | 19.238           |
| AM                    | 455.46                            | 21.074           |
| (AM/HM) <sub>10</sub> | 439.80                            | 18.691           |
| (AM/HM) <sub>20</sub> | 440.27                            | 18.921           |
| (AM/HM) <sub>40</sub> | 438.73                            | 18.260           |
| (AM/HM) <sub>80</sub> | 439.57                            | 18.731           |
